# Supplementary material for: Statins Combined with Anticoagulants on Heart Failure in Atrial Fibrillation Patients: A Disproportionality Analysis Based on the FAERS Database
Source: Research Square preprint supplement (doi:10.21203/rs.3.rs-7496458/v1), 2025-10-27
Supplement: Supplementary file 1 [file 3eec730cd9264e36b29e1a82.pdf]

## Cardiac failure (SMQ)

"acute left ventricular failure" "acute pulmonary oedema" "acute right ventricular failure" "cardiac asthma" "cardiac failure" "cardiac failure acute" "cardiac failure chronic" "cardiac failure congestive" "cardiac failure high output" "cardiogenic shock" "cardiohepatic syndrome" "cardiopulmonary failure" "cardiorenal syndrome" "chronic left ventricular failure" "chronic right ventricular failure" "congestive hepatopathy" "cor pulmonale" "cor pulmonale acute" "cor pulmonale chronic" "ejection fraction decreased" "hepatojugular reflux" "left ventricular failure" "low cardiac output syndrome" "neonatal cardiac failure" "obstructive shock" "pulmonary oedema" "pulmonary oedema neonatal" "right ventricular ejection fraction decreased" "right ventricular failure" "ventricular failure"

## The algorithms of ROR

Table 1 ROR method in disproportionality analysis

| Project                     | Specific Adverse Event Reports | Other Adverse Event Reports | Total     |
|-----------------------------|--------------------------------|-----------------------------|-----------|
| Drug 1 combined with Drug 2 | a                              | b                           | a+b       |
| Drug 1 without Drug 2       | c                              | d                           | c+d       |
| Total                       | a+c                            | b+d                         | n=a+b+c+d |

*a* represents the number of reports in which **Drug 1 combined with Drug 2** was associated with a specific adverse event.

*b* represents the number of reports in which **Drug 1 combined with Drug 2** was associated with other adverse events.

*c* represents the number of reports in which **Drug 1 without Drug 2** was associated with the specific adverse event.

*d* represents the number of reports in which **Drug 1 without Drug 2** was associated with other adverse events.

*n* represents the total number of adverse event reports associated with Drug 1.

$$ROR = \frac{(a/c)}{b/d} = \frac{ad}{bc}$$

$$95\% \text{ CI} = e^{\ln(ROR) \pm 1.96 \sqrt{\frac{1}{a} + \frac{1}{b} + \frac{1}{c} + \frac{1}{d}}}$$

## The algorithms of Ω shrinkage

Table 2 The algorithms of Ω shrinkage

| Project                  | Target AE | All other AEs | Total |
|--------------------------|-----------|---------------|-------|
| drug 1 and drug 2        | n111      | n110          | n11+  |
| drug 1 without drug 2    | n101      | n100          | n10+  |
| drug 2 without drug 1    | n011      | n010          | n01+  |
| Neither drug 1 or drug 2 | n001      | n000          | n00+  |
| Total                    | n++1      | n++0          | n+++  |

$$\Omega = \log_2 \left( \frac{n_{111} + 0.5}{E_{111} + 0.5} \right)$$

$$\Omega_{025} = \Omega - \frac{\varphi(0.975)}{\log(2) \sqrt{n_{111}}}$$

The detection criterion for Ω:

$$\Omega_{025} > 0$$
